# Supplementary material
Source: PubMed Central journal article supplement (PMC4225173)
Supplement: NIHMS628389-supplement-1.pdf [file NIHMS628389-supplement-1.pdf]

Supplementary Figure 1

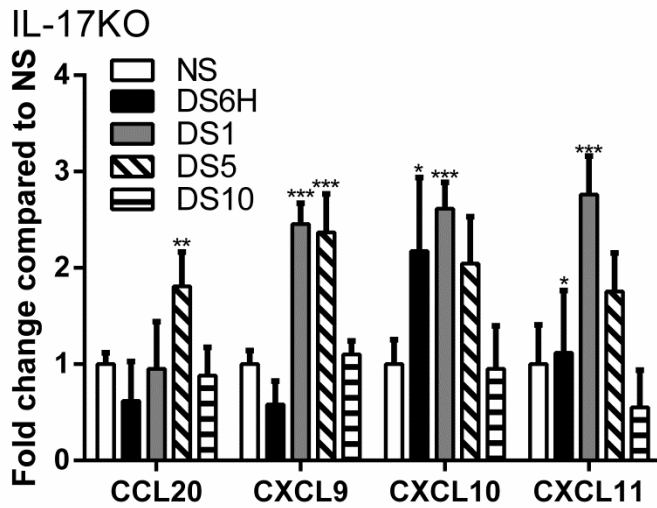

**Supplementary Figure 1: Expression of Th1-associated chemokines is independent of IL-17.** Gene expression of CCL20, CXCL9, CXCL10, and CXCL11 in the conjunctiva of non-stressed (NS), six hours (DS6H) of desiccating stress (DS), one day of DS (DS1), five (DS5), or ten days (DS10) of IL-17KO mice. Results represent the mean  $\pm$  SD expression of 5 animals per group. \*,  $p < 0.05$ ; \*\*,  $p < 0.01$ ; \*\*\*,  $p < 0.001$  compared to NS mice.

Supplementary Figure 2

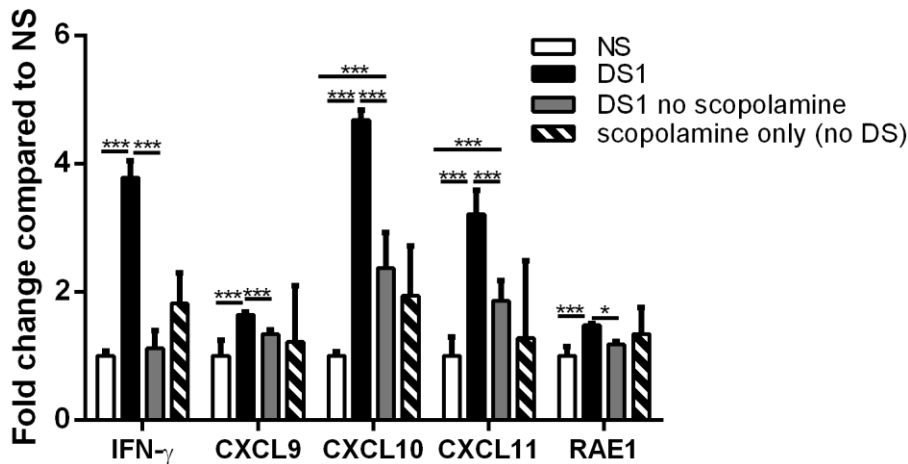

**Supplementary Figure 2: Scopolamine treatment does not inhibit function of NK cells.** Gene expression of IFN- $\gamma$ , CXCL9, CXCL10, CXCL11, and RAE1 in the conjunctiva of NS, DS1 (with scopolamine), DS1 without scopolamine, or scopolamine treated without DS. Results represent the mean  $\pm$  SD expression of 5 animals per group. \*,  $p < 0.05$ ; \*\*,  $p < 0.01$ ; \*\*\*,  $p < 0.001$  compared to NS mice.
